# Supplementary material for: Neutrophils are important for the development of pro-reparative macrophages after irreversible electroporation of the liver in mice
Source: PubMed Central journal article supplement (PMC8298444; doi:10.1038/s41598-021-94016-8), 2021-07-22
Supplement: 41598_2021_94016_MOESM7_ESM.pdf [file 41598_2021_94016_MOESM7_ESM.pdf]

**Neutrophils are Important for the Development of Pro-Reparative Macrophages  
after Irreversible Electroporation of the Liver in Mice**

Maya Lopez-Ichikawa<sup>1</sup>, Ngan K. Vu<sup>1</sup>, Amar Nijagal<sup>1</sup>, Boris Rubinsky<sup>2</sup>,  
and Tammy T. Chang<sup>1\*</sup>

<sup>1</sup>Department of Surgery, University of California, San Francisco, CA 94143

<sup>2</sup>Department of Mechanical Engineering, University of California, Berkeley, CA 94720

\*Corresponding Author:

Tammy T. Chang, MD, PhD  
University of California, San Francisco  
513 Parnassus Ave., HSW 1601  
San Francisco, CA 94143  
Tel: 415-476-6069  
Email: [tammy.chang@ucsf.edu](mailto:tammy.chang@ucsf.edu)

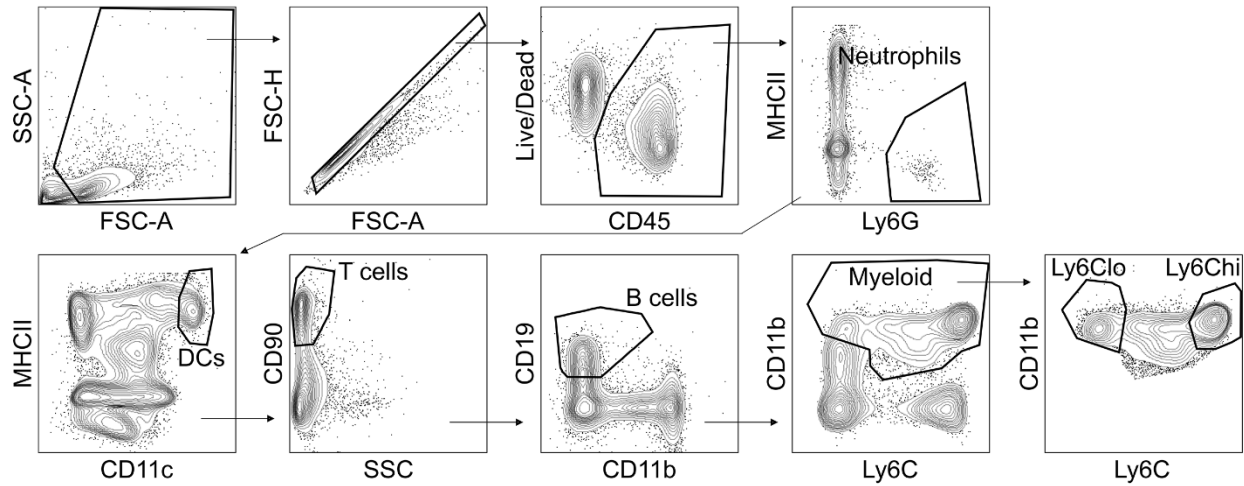

**Supplemental Figure 1.** Flow cytometry gating strategy for identification of liver myeloid cell populations.

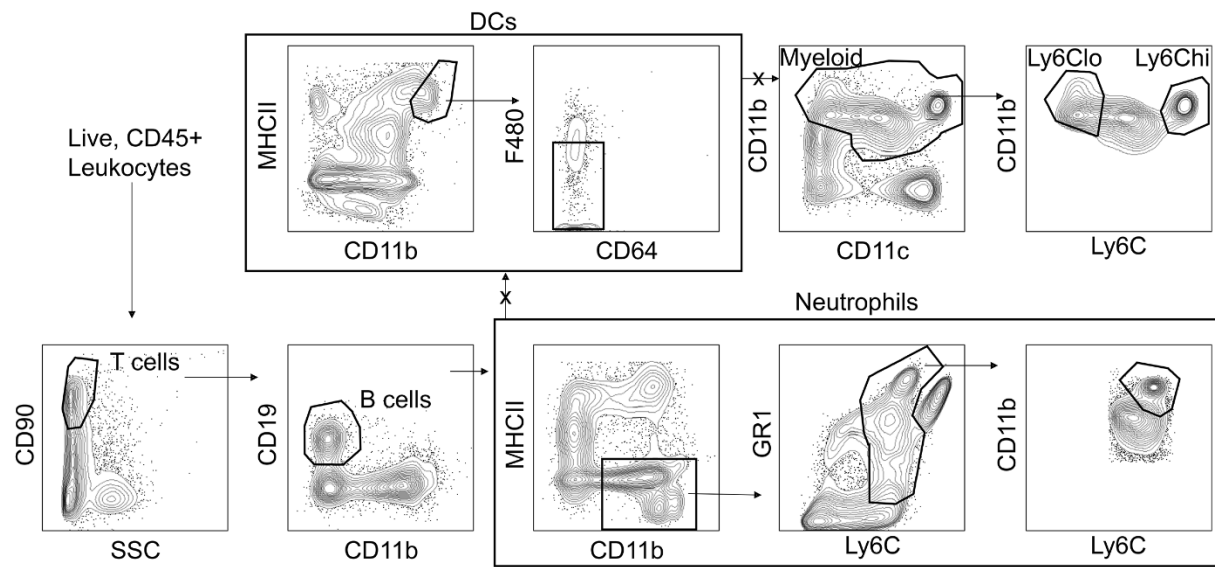

**Supplemental Figure 2.** Flow cytometry gating strategy for identification of liver myeloid cell populations after neutrophil depletion with anti-Ly6G antibody. The “x” represents excluded populations.

**Supplemental Movie 1.** Neutrophil movement (LysM-eGFP; green) in liver at baseline. PECAM-1 (red) staining shows microvasculature.

**Supplemental Movie 2.** Neutrophil movement (LysM-eGFP; green) in liver 30 minutes after IRE. PECAM-1 (red) staining shows microvasculature.

**Supplemental Movie 3.** Neutrophil movement (LysM-eGFP; green) in liver 1 hour after IRE. PECAM-1 (red) staining shows microvasculature.

**Supplemental Movie 4.** Neutrophil movement (LysM-eGFP; green) in liver 2 hours after IRE. PECAM-1 (red) staining shows microvasculature. Blue shows SYTOX.

**Supplemental Movie 5.** Neutrophil movement (LysM-eGFP; green) in liver 4 hours after IRE. PECAM-1 (red) staining shows microvasculature. Blue shows SYTOX.

**Supplemental Movie 6.** Liver microvascular remains patent and perfused 30 minutes after IRE. Green shows neutrophils (LysM-eGFP) and red shows Evan Blue dye flowing within vessels. The movie is sped up approximately 5x.
